# Supplementary material
Source: publisher site journal article supplement (https://www.dovepress.com/get_supplementary_file.php?f=479881.docx)
Supplement: Supplementary file 1 [file get_supplementary_file.php]

**Supplementary Material**

**
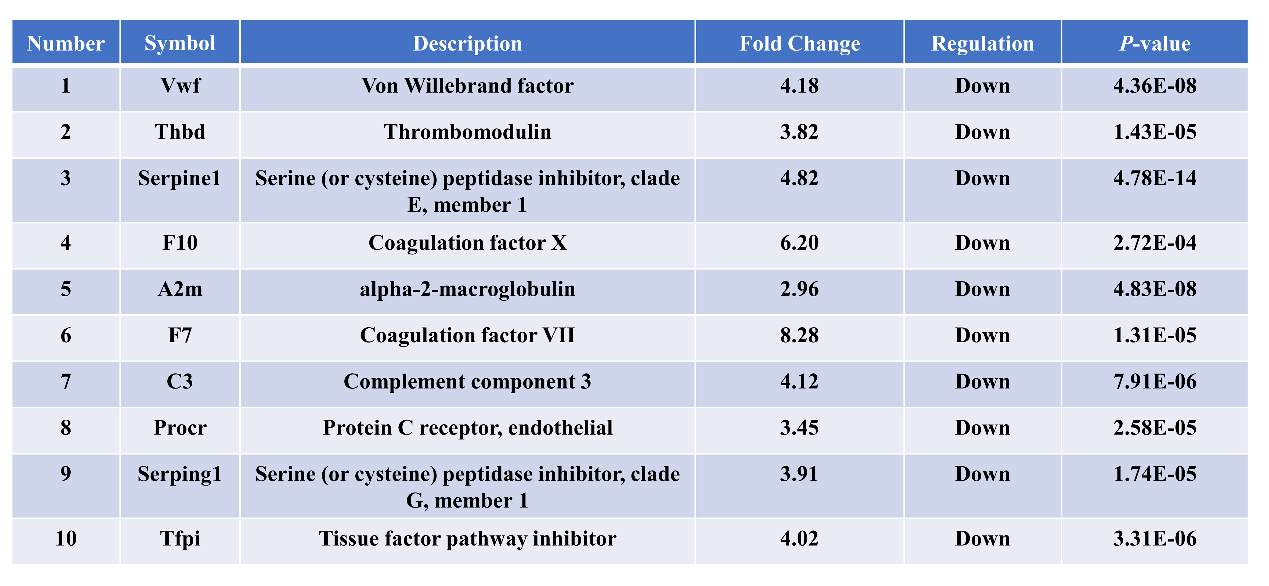
**

**Supplementary Figure S1** The detailed information of complement and coagulation cascades related key targets regulated by GXNT.


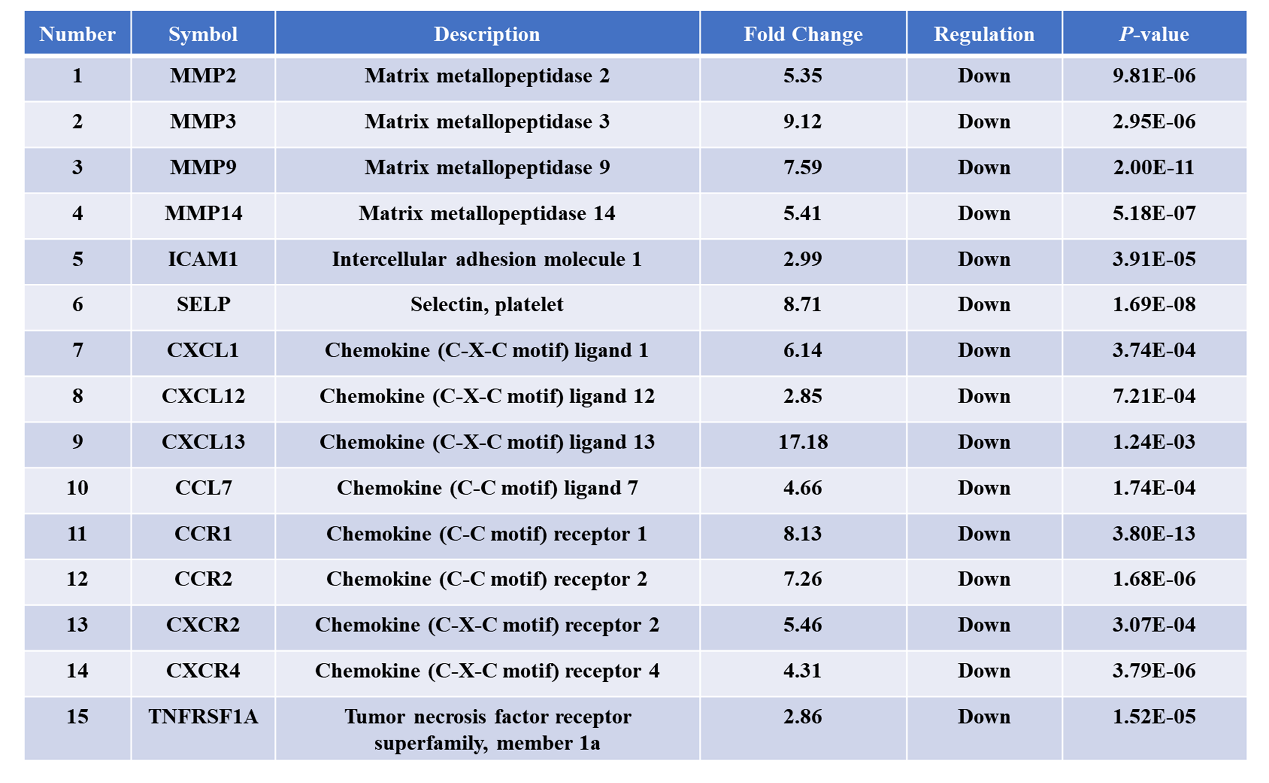


**Supplementary Figure S2** The detailed information of inflammation related key targets regulated by GXNT.

**Supplementary Table S1** The regression equation, linear range, and lower limit of quantification (LLOQ) of the analytes.

| **Tissue** | **Analytes** | **Regression equation** | **R2** | **Linear range (ng/mL)** | **LLOQ (ng/mL)** |
| --- | --- | --- | --- | --- | --- |
| Brain | Senkyunolide I | y = 0.0005x + 0.0014 | 0.9960 | 0.1893-10600 | 0.1893 |
| Protocatechuic acid | y = 0.4991x + 1.1418 | 0.9951 | 0.06872-10600 | 0.0687 |
| Danshensu | y = 0.0015x + 0.0054 | 0.9921 | 0.2160-10300 | 0.2160 |

**Supplementary Table S2** Intra-day and inter-day precision and accuracy for the determination of analytes in brain tissue (n = 6).

| **Tissue** | **Analytes** | **Nominal concentration**  **(ng/mL)** | **Inter-day** | | | **Intra-day** | | |
| --- | --- | --- | --- | --- | --- | --- | --- | --- |
| **Observed**  **concentration (ng/mL)** | **Precision**  **(RSD, %)** | **Accuracy (RE, %)** | **Observed concentration**  **(ng/mL)** | **Precision**  **(RSD, %)** | **Accuracy (RE, %)** |
| Brain | Senkyunolide I | 5000 | 5322.14 | 3.36 | 6.44 | 5044.44 | 4.19 | 0.89 |
| 1250 | 1182.41 | 6.37 | -5.41 | 1061.91 | 6.35 | -11.85 |
| 312 | 278.95 | 10.53 | -10.74 | 252.98 | 8.65 | -6.25 |
| Protocatechuic acid | 5000 | 5208.03 | 3.31 | 4.16 | 4996.31 | 2.64 | -0.07 |
| 1250 | 1321.87 | 7.39 | 5.75 | 1389.55 | 7.34 | 11.16 |
| 312 | 308.33 | 2.74 | -1.33 | 313.44 | 2.47 | 0.30 |
| Danshensu | 5000 | 4605.96 | 7.38 | -7.88 | 4650.52 | 8.71 | -6.99 |
| 1250 | 1249.69 | 8.04 | -0.03 | 1368.17 | 4.91 | 9.45 |
| 312 | 339.68 | 3.81 | 8.70 | 352.72 | 3.89 | 12.87 |

**Supplementary Table S3** Thematrix effect and extraction recovery for the analytes in brain tissue (n = 6).

| **Tissue** | **Analytes** | **Spiked concentration**  **(ng/mL)** | **Matrix effect** | | **Recovery** | |
| --- | --- | --- | --- | --- | --- | --- |
| **Mean ± SD (%)** | **RSD (%)** | **Mean ± SD (%)** | **RSD (%)** |
| Brain | Senkyunolide I | 10000 | 86.84±8.54 | 9.83 | 87.33±5.36 | 6.14 |
| 5000 | 100.45±5.50 | 5.47 | 101.61±5.44 | 5.36 |
| 2500 | 101.78±8.02 | 7.88 | 104.70±11.43 | 10.92 |
| Protocatechuic acid | 10000 | 100.52±3.33 | 3.31 | 101.04±3.69 | 3.65 |
| 5000 | 98.15±4.99 | 5.08 | 99.27±4.01 | 4.03 |
| 2500 | 87.38±7.08 | 8.10 | 87.42±8.25 | 9.44 |
| Danshensu | 10000 | 111.98±7.10 | 6.34 | 107.66±6.58 | 6.11 |
| 5000 | 85.48±7.76 | 9.07 | 85.51±8.39 | 9.81 |
| 2500 | 112.07±8.13 | 7.25 | 107.19±10.52 | 9.82 |

**Supplementary Table S4** The stability of analytes in brain tissue under different storage conditions (n = 6).

| **Tissue** | **Analytes** | **Nominal**  **concentration (ng/mL)** | **25 °C for 4 h** | | **Frozen for 30 days** | | **Three-freeze–thaw cycles** | | **4°C for 24 h** | |
| --- | --- | --- | --- | --- | --- | --- | --- | --- | --- | --- |
| **Precision**  **(RSD, %)** | **Accuracy**  **(RE, %)** | **Precision**  **(RSD, %)** | **Accuracy**  **(RE, %)** | **Precision**  **(RSD, %)** | **Accuracy**  **(RE, %)** | **Precision**  **(RSD, %)** | **Accuracy**  **(RE, %)** |
| Brain | Senkyunolide I | 10000 | 7.28 | -7.75 | 9.17 | -8.03 | 9.13 | -10.01 | 9.18 | -10.21 |
| 2500 | 4.75 | 7.81 | 4.84 | 9.47 | 3.57 | 11.91 | 4.69 | 7.61 |
| 625 | 3.33 | -5.26 | 3.27 | -11.65 | 1.68 | -11.13 | 2.93 | -10.91 |
| Protocatechuic acid | 10000 | 2.64 | 6.53 | 0.74 | 8.71 | 2.90 | 7.02 | 2.91 | 7.07 |
| 2500 | 5.04 | -7.30 | 4.31 | -11.15 | 5.13 | -10.01 | 5.36 | -9.23 |
| 625 | 2.34 | 10.50 | 2.38 | 12.35 | 2.57 | 11.44 | 2.57 | 11.77 |
| Danshensu | 10000 | 4.70 | 12.06 | 5.63 | 10.72 | 4.89 | 10.98 | 4.48 | 10.64 |
| 2500 | 5.75 | 8.27 | 4.83 | 12.31 | 6.70 | 9.53 | 6.94 | 12.29 |
| 625 | 5.65 | -10.08 | 6.10 | -11.03 | 5.18 | -8.36 | 5.37 | -12.09 |
